# Supplementary material for: Assessment of sorbent impregnated PUF disks (SIPs) for long-term sampling of legacy POPs
Source: Royal Society of Chemistry journal article supplement (doi:10.1039/c1em10697j), 2011-11-09
Supplement: c1em10697j.pdf [file c1em10697j.pdf]

# Supporting Information

---

## Assessment of sorbent impregnated PUF disks (SIPs) for long-term sampling of legacy POPs

Jasmin K. Schuster<sup>\*</sup>, Rosalinda Gioia<sup>\*</sup>, Tom Harner<sup>‡</sup>, Sum Chi Lee<sup>‡</sup>, Knut Breivik<sup>◊,♦</sup>, Kevin C. Jones<sup>\*</sup>

<sup>\*</sup>Centre for Chemicals Management, Lancaster Environment Centre, Lancaster University, Lancaster LA1 4YQ, U.K.

<sup>‡</sup>Environment Canada, Science & Technology Branch, Toronto M3H 5T4, Canada

<sup>◊</sup>Norwegian Institute for Air Research, P.O. Box 100, NO-2027 Kjeller, Norway

<sup>♦</sup>University of Oslo, Department of Chemistry, P.O. Box 1033, NO-0315 Oslo, Norway

### Contents

|                                                                                                                                                                    |   |
|--------------------------------------------------------------------------------------------------------------------------------------------------------------------|---|
| SI-Figure 1. Flying saucer device as sampling chamber for SIPs deployed at 10 sites in the UK and Norway .....                                                     | 2 |
| SI-Figure 2. Meteorological information for the sampling period May 2009 – April 2010 .....                                                                        | 3 |
| SI-Figure 3. POP loads plotted against the sampling period and the air concentrations monitored with the active air sampler for HCB and PCB homologue groups ..... | 4 |
| SI-Table 1. Sampling rate ranges <i>R</i> reported for different compounds and PAS .....                                                                           | 5 |
| SI-Table 2. POP ranges and approximate sampling rates <i>R</i> for selected POPs .....                                                                             | 6 |
| SI-Table 3. Monitored and estimated PCB concentrations at the field sites in the UK and Norway .....                                                               | 7 |
| SI-Text 1. Estimation of atmospheric concentrations for background sites .....                                                                                     | 8 |
| References .....                                                                                                                                                   | 9 |

**SI-Figure 1. Flying saucer device as sampling chamber for SIPs deployed at 10 sites in the UK and Norway**

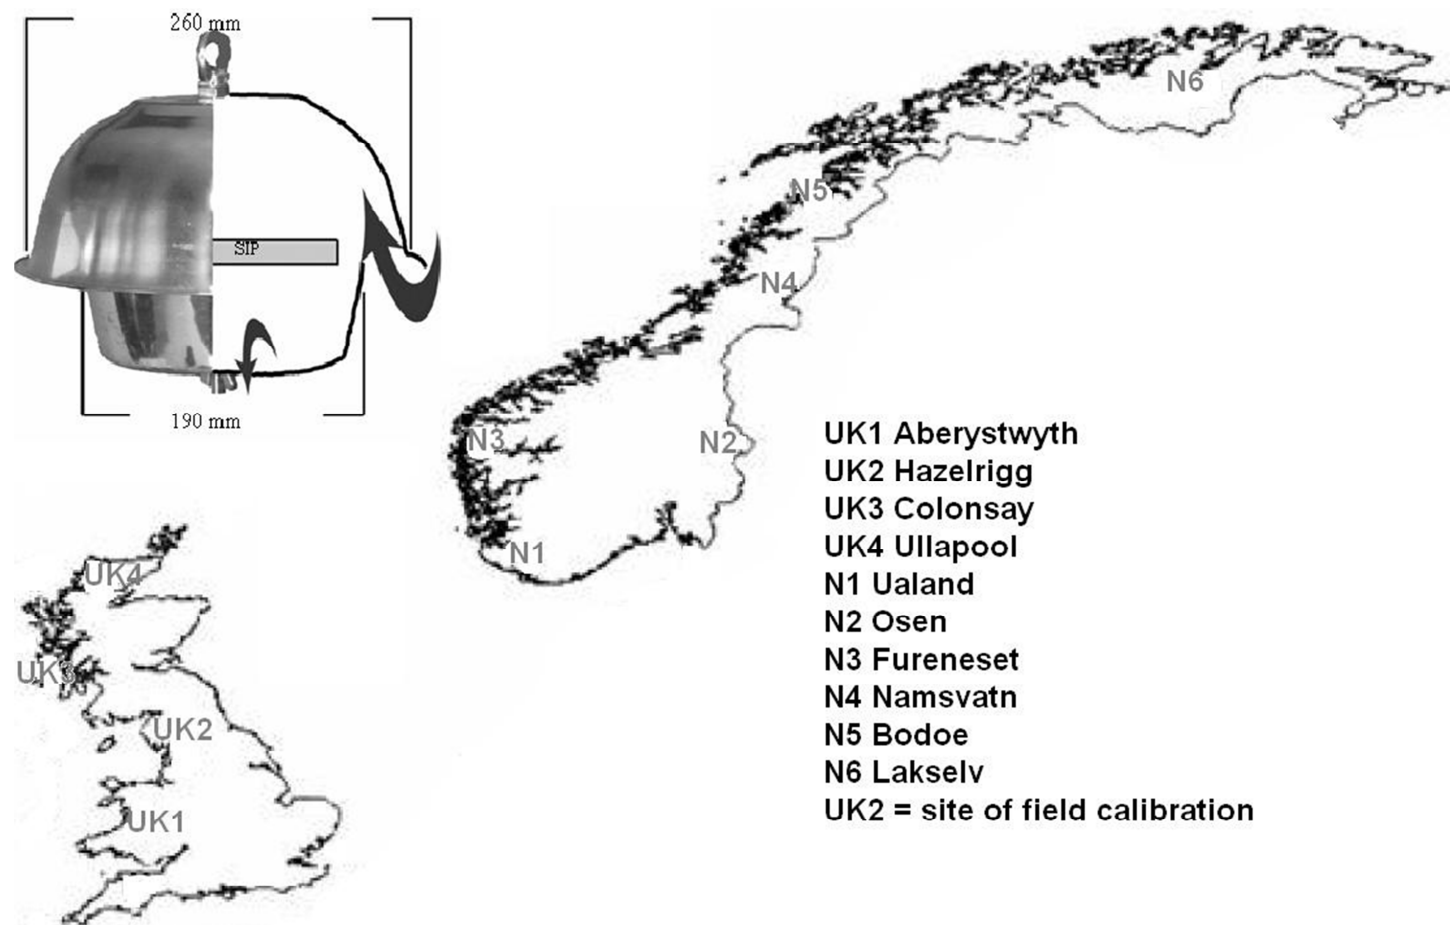

SI-Figure 2. Meteorological information for the sampling period May 2009 – April 2010

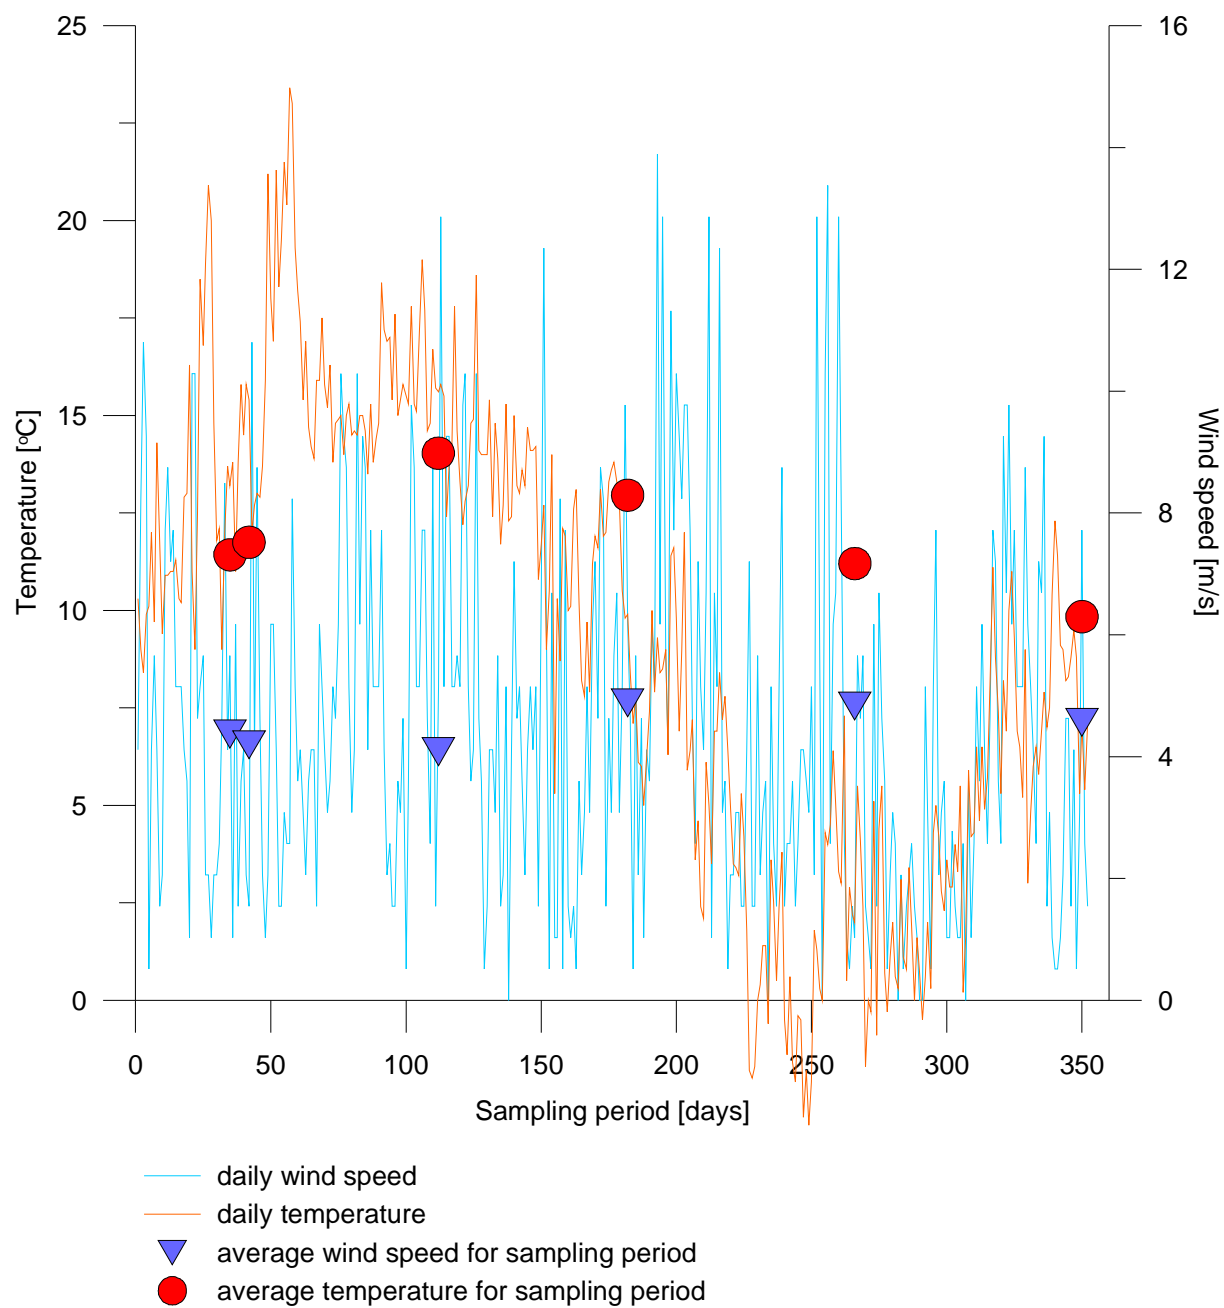

SI-Figure 3. POP loads plotted against the sampling period and the air concentrations monitored with the active air sampler for HCB and PCB homologue groups

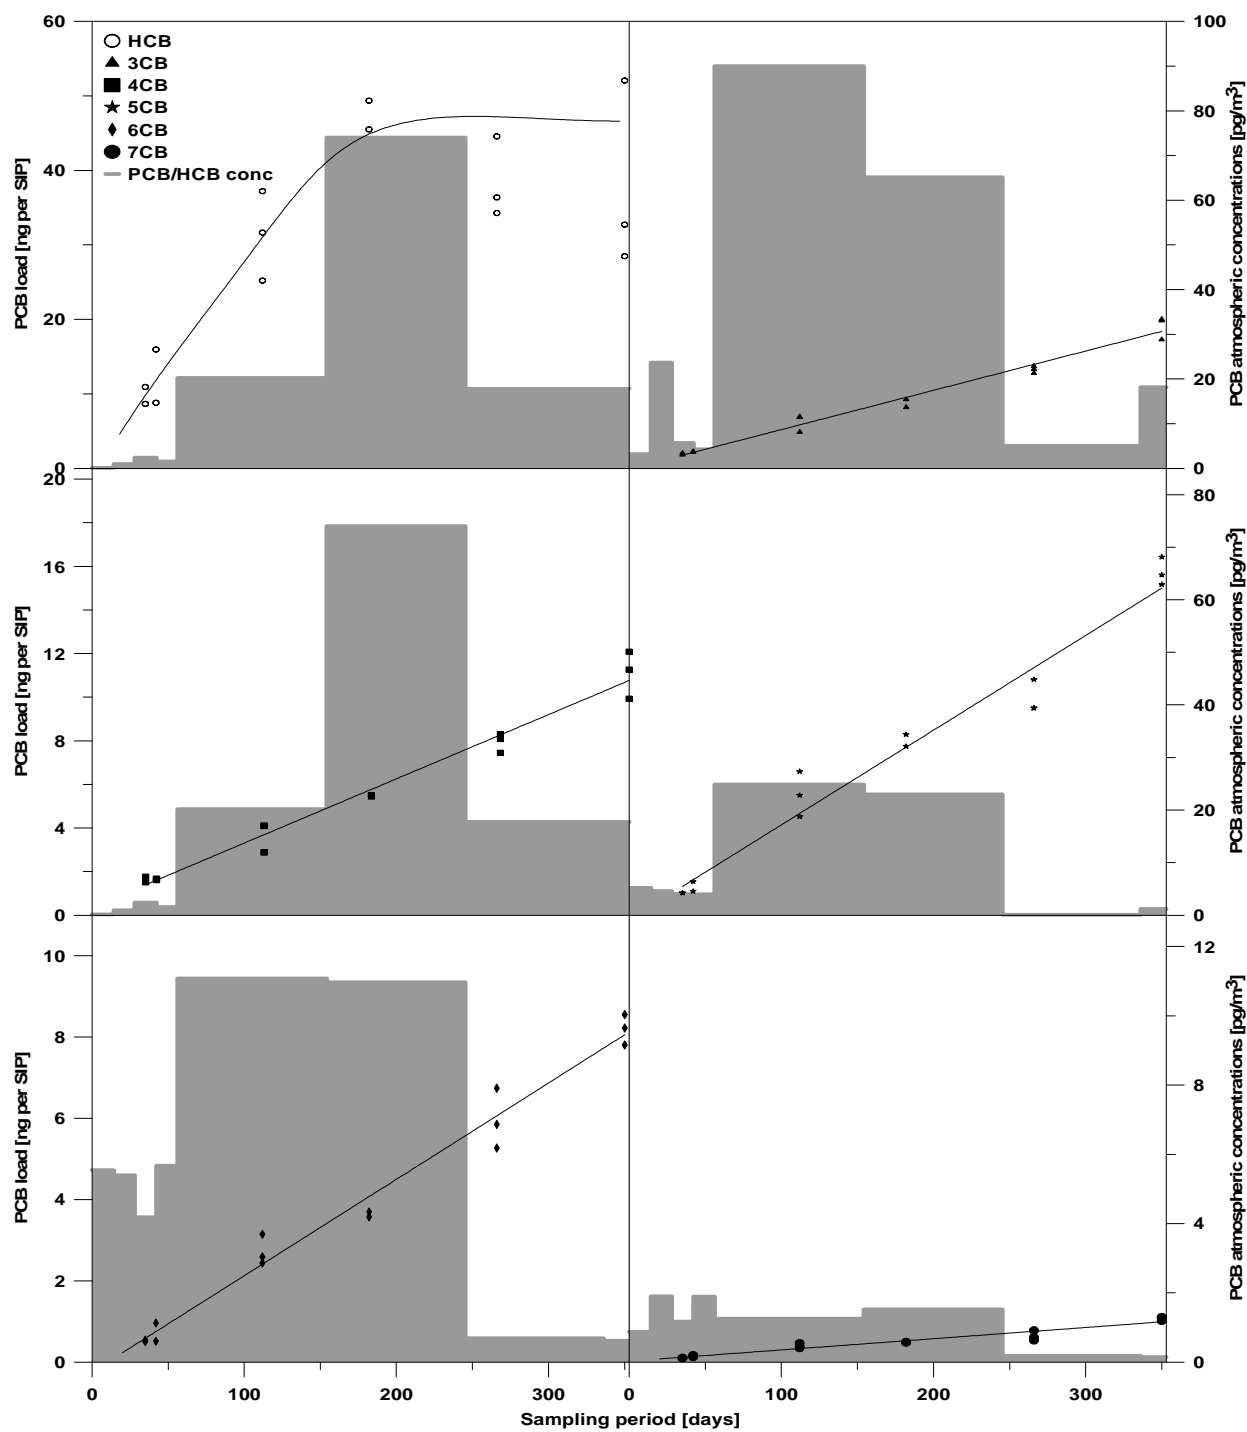

**SI-Table 1. Sampling rate ranges *R* reported for different compounds and PAS**

(PUF = polyurethane foam disk, FSD = flying saucer device, SPMD = semi-permeable membrane device, SIP = sorbent-impregnated PUF disk, XAD = polymeric resin)

| <b>Compound</b>      | <b><i>R</i> range [m<sup>3</sup>/day]</b> | <b>PAS</b>                          | <b>Source</b>                       |
|----------------------|-------------------------------------------|-------------------------------------|-------------------------------------|
| <b>PCBs</b>          | 2.0 – 8.3                                 | PUF, no shelter, indoors            | Shoeib and Harner 2002 <sup>1</sup> |
| <b>PCBs</b>          | 4.5 – 14.6                                | PUF in FSD, wind tunnel             | Tuduri et al. 2006 <sup>2</sup>     |
| <b>PCBs</b>          | 0.6 – 1.6                                 | PUF in FSD, indoors                 | Hazrati et al. 2007 <sup>3</sup>    |
| <b>PCBs</b>          | 2.9 – 7.3                                 | PUF in FSD, outdoors                | Chaemfa et al. 2008 <sup>4</sup>    |
| <b>PCBs</b>          | 2.5 – 9.8                                 | PUF (high density) in FSD, outdoors | Chaemfa et al. 2009 <sup>5</sup>    |
| <b>PCBs</b>          | 3.5 – 12                                  | PUF (low density) in FSD, outdoors  | Chaemfa et al. 2009 <sup>5</sup>    |
| <b>PCBs</b>          | 3.4 – 9.9                                 | SPMD, no shelter, indoors           | Shoeib and Harner 2002 <sup>1</sup> |
| <b>PCBs</b>          | 3.5 – 12                                  | SPMD in Stevenson screen, outdoors  | Ockenden et al. 1998 <sup>6</sup>   |
| <b>PCBs</b>          | 2.3 – 12.5                                | SIP in FSD, outdoors                | Genualdi et al. 2010 <sup>7</sup>   |
| <b>PBDEs</b>         | 1.2 – 10.7                                | PUF (high density) in FSD, outdoors | Chaemfa et al. 2009 <sup>5</sup>    |
| <b>PBDEs</b>         | 1.4 – 12.5                                | PUF (low density) in FSD, outdoors  | Chaemfa et al. 2009 <sup>5</sup>    |
| <b>PBDEs</b>         | 1.8 – 5.7                                 | PUF in FSD, outdoors                | Chaemfa et al. 2009 <sup>8</sup>    |
| <b>HCB</b>           | 7.0 ± 1.8                                 | PUF in FSD, outdoors                | Chaemfa et al. 2008 <sup>4</sup>    |
| <b>OC pesticides</b> | 1                                         | XAD sampler                         | Daly et al. 2007 <sup>9</sup>       |
| <b>OC pesticides</b> | 0.52                                      | XAD sampler                         | Shen et al. 2005 <sup>10</sup>      |
| <b>OC pesticides</b> | 2.1                                       | XAD sampler                         | Gouin et al. 2008 <sup>11</sup>     |
| <b>PFCs</b>          | 1.4 – 4.6                                 | SIP in FSD, indoors                 | Shoeib et al. 2008 <sup>12</sup>    |
| <b>PFCs</b>          | 1.4 – 1.5                                 | PUF in FSD, indoors                 | Shoeib et al. 2008 <sup>12</sup>    |
| <b>Siloxanes</b>     | 2.3 – 9.2                                 | SIP in FSD, outdoors                | Genualdi et al. 2011 <sup>13</sup>  |

**SI-Table 2. POP ranges and approximate sampling rates *R* for selected POPs**

| <b>POPs</b>        | <b>POPs monitored on SIPs [pg]</b> |        | <b><i>R</i> [m<sup>3</sup>/day]</b> |
|--------------------|------------------------------------|--------|-------------------------------------|
| <b>PCB 18</b>      | 870                                | - 7716 | 2.16 ± 0.35                         |
| <b>PCB 22</b>      | 343                                | - 2926 | 0.36 ± 0.04                         |
| <b>PCB 28/31</b>   | 843                                | - 6099 | 0.90 ± 0.11                         |
| <b>PCB 41/64</b>   | 254                                | - 3104 | 0.94 ± 0.13                         |
| <b>PCB 44</b>      | 329                                | - 3062 | 2.85 ± 2.77                         |
| <b>PCB 49</b>      | 275                                | - 2528 | 5.62 ± 4.81                         |
| <b>PCB 52</b>      | 490                                | - 5200 | 3.19 ± 0.35                         |
| <b>PCB 60/56</b>   | 192                                | - 1429 | 0.76 ± 0.10                         |
| <b>PCB 70</b>      | 227                                | - 2755 | 2.09 ± 0.31                         |
| <b>PCB 74</b>      | 274                                | - 2689 | 0.88 ± 0.17                         |
| <b>PCB 87</b>      | 429                                | - 1642 | 2.24 ± 0.22                         |
| <b>PCB 90/101</b>  | 355                                | - 4388 | 2.58 ± 0.25                         |
| <b>PCB 95</b>      | 314                                | - 3876 | 1.62 ± 0.74                         |
| <b>PCB 99</b>      | 82                                 | - 1926 | 3.29 ± 0.48                         |
| <b>PCB 105</b>     | 141                                | - 542  | 3.26 ± 0.59                         |
| <b>PCB 110</b>     | 191                                | - 3000 | 2.95 ± 1.56                         |
| <b>PCB 118</b>     | 63                                 | - 1555 | 2.98 ± 0.43                         |
| <b>PCB 123</b>     | 11                                 | - 246  | 0.47 ± 0.11                         |
| <b>PCB 138</b>     | 169                                | - 1570 | 2.62 ± 0.46                         |
| <b>PCB 141</b>     | 40                                 | - 882  | 2.36 ± 0.81                         |
| <b>PCB 149</b>     | 239                                | - 2090 | 3.03 ± 0.31                         |
| <b>PCB 151</b>     | 72                                 | - 876  | 2.79 ± 0.23                         |
| <b>PCB 153/132</b> | 193                                | - 3707 | 4.18 ± 0.34                         |
| <b>PCB 174</b>     | 76                                 | - 189  | 7.73 ± 0.22                         |
| <b>PCB 180</b>     | 56                                 | - 366  | 3.62 ± 0.34                         |
| <b>PCB 183</b>     | 28                                 | - 151  | 1.40 ± 0.33                         |
| <b>PCB 187</b>     | 45                                 | - 425  | 3.52 ± 0.35                         |
| <b>PCB 199</b>     | 2                                  | - 21   | NA                                  |
| <b>PCB 203</b>     | 44                                 | - 81   | 6.26 ± 1.46                         |
| <b>BDE 47</b>      | 41                                 | - 1182 | 2.31 ± 0.27                         |
| <b>BDE 49</b>      | 17                                 | - 653  | 5.93 ± 0.98                         |
| <b>BDE 99</b>      | 60                                 | - 675  | 0.72 ± 0.16                         |
| <b>BDE 100</b>     | 14                                 | - 139  | 0.66 ± 0.09                         |
| <b>BDE 153</b>     | 30                                 | - 548  | 1.66 ± 0.36                         |

**SI-Table 3. Monitored and estimated PCB concentrations at the field sites in the UK and Norway**

| <b>SIP monitored concentrations [pg/m<sup>3</sup>]</b> |             |             |             |             |             |             |             |
|--------------------------------------------------------|-------------|-------------|-------------|-------------|-------------|-------------|-------------|
| <b>Sites</b>                                           | <b>3CBs</b> | <b>4CBs</b> | <b>5CBs</b> | <b>6CBs</b> | <b>7CBs</b> | <b>8CBs</b> | <b>ΣCBs</b> |
| <b>UK1</b>                                             | 11.3        | 5.7         | 7.3         | 3.5         | 0.7         | 0.003       | 28.6        |
| <b>UK2</b>                                             | 22.5        | 14.6        | 13.4        | 5.8         | 1.2         | 0.007       | 57.5        |
| <b>UK3</b>                                             | 7.2         | 4.1         | 3.5         | 2.0         | 0.4         | 0.002       | 17.2        |
| <b>UK4</b>                                             | 6.0         | 2.2         | 1.6         | 0.9         | 0.2         | NA          | 10.8        |
| <b>N1</b>                                              | 7.2         | 3.5         | 4.1         | 2.1         | 0.3         | 0.001       | 17.2        |
| <b>N2</b>                                              | 4.9         | 1.4         | 2.0         | 1.2         | 0.3         | 0.001       | 9.7         |
| <b>N3</b>                                              | 2.9         | 1.5         | 1.8         | 0.9         | 0.3         | 0.001       | 7.3         |
| <b>N4</b>                                              | 5.4         | 1.9         | 1.9         | 1.2         | 0.3         | 0.001       | 10.7        |
| <b>N5</b>                                              | 4.0         | 2.1         | 1.7         | 1.1         | 0.2         | 0.001       | 9.2         |
| <b>N6</b>                                              | 2.1         | 1.3         | 1.3         | 0.7         | 0.1         | NA          | 5.4         |
| <b>Estimated concentrations [pg/m<sup>3</sup>]</b>     |             |             |             |             |             |             |             |
| <b>Sites</b>                                           | <b>3CBs</b> | <b>4CBs</b> | <b>5CBs</b> | <b>6CBs</b> | <b>7CBs</b> | <b>8CBs</b> | <b>ΣCBs</b> |
| <b>UK1</b>                                             | 1.3         | 2.1         | 5.0         | 3.9         | 0.9         | 0.030       | 13.3        |
| <b>UK2</b>                                             | 2.7         | 6.4         | 14.3        | 10.0        | 2.4         | 0.170       | 36.0        |
| <b>UK3</b>                                             | 1.6         | 1.4         | 1.9         | 1.5         | 0.6         | 0.317       | 7.2         |
| <b>UK4</b>                                             | 1.6         | 1.2         | 1.5         | 1.0         | 0.2         | 0.026       | 5.5         |
| <b>N1</b>                                              | 0.9         | 2.9         | 4.7         | 4.5         | 1.1         | 0.076       | 14.2        |
| <b>N2</b>                                              | 0.6         | 1.3         | 1.8         | 0.9         | 0.2         | 0.026       | 4.8         |
| <b>N3</b>                                              | 0.0         | 1.5         | 1.8         | 0.9         | 0.1         | NA          | 4.4         |
| <b>N4</b>                                              | 1.1         | 2.0         | 1.7         | 1.2         | 0.2         | 0.082       | 6.4         |
| <b>N5</b>                                              | 0.5         | 1.5         | 2.4         | 1.2         | 0.1         | 0.196       | 5.9         |
| <b>N6</b>                                              | 2.9         | 1.1         | 1.2         | 0.5         | 0.1         | NA          | 5.9         |

### SI-Text 1. Estimation of atmospheric concentrations for background sites

SIPs were deployed at passive air sampling sites that were established in 1994. Two year average values for atmospheric POP concentrations are available for the period of 1998-2008<sup>14-17</sup> derived from SPMDs. The atmospheric concentrations were calculated from SPMD loads and site specific sampling rates considering the annual mean temperature<sup>1</sup> and the possible equilibrium approach for the lighter congeners.

It was established that the POP concentrations for 1998 – 2008 follow a first order decline in the atmosphere. The slope and intercept of the natural logarithm of the atmospheric concentrations versus the sampling years were determined for each individual site. It was assumed that the atmospheric decline rate for 1998-2009 is not different from the decline rate observed 1998 – 2008. Therefore the average atmospheric concentrations for the sampling period of summer 2008 – 2009 were estimated from the slopes and intercept for the period of 1998 – 2008 (as illustrated below).

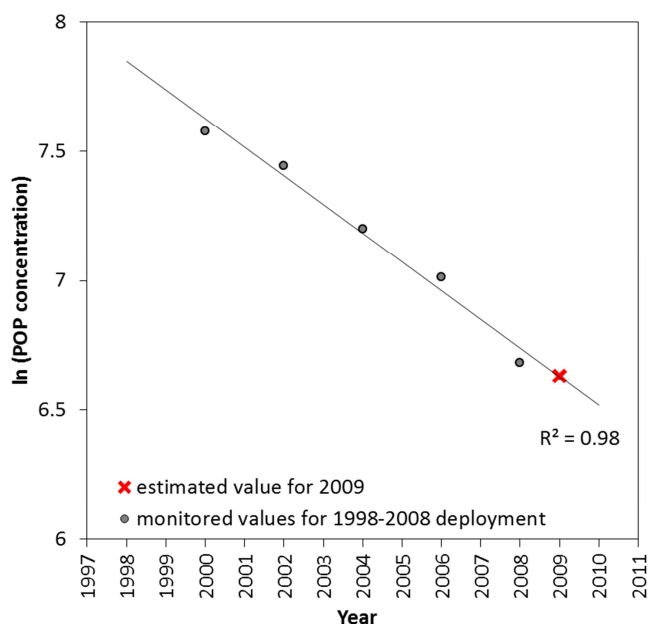



## References

1. M. Shoeib and T. Harner, *Environmental Science & Technology*, 2002, **36**, 4142-4151.
2. L. Tuduri, T. Harner and H. Hung, *Environmental Pollution*, 2006, **144**, 377-383.
3. S. Hazrati and S. Harrad, *Chemosphere*, 2007, **67**, 448-455.
4. C. Chaemfa, J. L. Barber, T. Gocht, T. Harner, I. Holoubek, J. Klanova and K. C. Jones, *Environmental Pollution*, 2008, **156**, 1290-1297.
5. C. Chaemfa, J. L. Barber, K. S. Kim, T. Harner and K. C. Jones, *Atmospheric Environment*, 2009, **43**, 3843-3849.
6. W. A. Ockenden, H. F. Prest, G. O. Thomas, A. Sweetman and K. C. Jones, *Environmental Science & Technology*, 1998, **32**, 1538-1543.
7. S. Genualdi, S. C. Lee, M. Shoeib, A. Gawor, L. Ahrens and T. Harner, *Environmental Science & Technology*, 2010, **44**, 5534-5539.
8. C. Chaemfa, J. L. Barber, C. Moeckel, T. Gocht, T. Harner, I. Holoubek, J. Klanova and K. C. Jones, *JEM Journal of Environmental Monitoring*, 2009, **11**, 1859-1865.
9. G. L. Daly, Y. D. Lei, C. Teixeira, D. C. G. Muir and F. Wania, *Environmental Science & Technology*, 2007, **41**, 6020-6025.
10. L. Shen, F. Wania, Y. D. Lei, C. Teixeira, D. C. G. Muir and T. F. Bidleman, *Environmental Science & Technology*, 2005, **39**, 409-420.
11. T. Gouin, F. Wania, C. Ruepert and L. E. Castillo, *Environmental Science & Technology*, 2008, **42**, 6625-6630.
12. M. Shoeib, T. Harner, S. C. Lee, D. Lane and J. P. Zhu, *Anal. Chem.*, 2008, **80**, 675-682.
13. S. Genualdi, T. Harner, Y. Cheng, M. MacLeod, K. M. Hansen, R. van Egmond, M. Shoeib and S. C. Lee, *Environmental Science & Technology*, 2011, **45**, 3349-3354.
14. R. Gioia, E. Steinnes, G. O. Thomas, S. N. Meijer and K. C. Jones, *Journal of Environmental Monitoring*, 2006, **8**, 700-710.
15. F. M. Jaward, S. N. Meijer, E. Steinnes, G. O. Thomas and K. C. Jones, *Environmental Science & Technology*, 2004, **38**, 2523-2530.
16. S. N. Meijer, W. A. Ockenden, E. Steinnes, B. P. Corrigan and K. C. Jones, *Environmental Science & Technology*, 2003, **37**, 454-461.
17. J. K. Schuster, R. Gioia, K. Breivik, E. Steinnes, M. Scheringer and K. C. Jones, *Environmental Science & Technology*, 2010, **44**, 6760-6766.
